# Supplementary material
Source: publisher figshare collection journal article supplement (https://acs.figshare.com/ndownloader/files/11228879)
Supplement: Supplementary file 1 [file 11228879]

  
data_ic18394 
  
_audit_creation_method            SHELXL-97 
_chemical_name_systematic 
; 
 ? 
; 
_chemical_name_common             ? 
_chemical_melting_point           ? 
_chemical_formula_moiety          ? 
_chemical_formula_sum 
 'C60 H60 F16 N4 O6' 
_chemical_formula_weight          1237.12 
  
loop_ 
 _atom_type_symbol 
 _atom_type_description 
 _atom_type_scat_dispersion_real 
 _atom_type_scat_dispersion_imag 
 _atom_type_scat_source 
 'C'  'C'   0.0181   0.0091 
 'International Tables Vol C Tables 4.2.6.8 and 6.1.1.4' 
 'H'  'H'   0.0000   0.0000 
 'International Tables Vol C Tables 4.2.6.8 and 6.1.1.4' 
 'N'  'N'   0.0311   0.0180 
 'International Tables Vol C Tables 4.2.6.8 and 6.1.1.4' 
 'O'  'O'   0.0492   0.0322 
 'International Tables Vol C Tables 4.2.6.8 and 6.1.1.4' 
 'F'  'F'   0.0727   0.0534 
 'International Tables Vol C Tables 4.2.6.8 and 6.1.1.4' 
  
_symmetry_cell_setting            Orthorhombic 
_symmetry_space_group_name_H-M    Iba2 
  
loop_ 
 _symmetry_equiv_pos_as_xyz 
 'x, y, z' 
 '-x, -y, z' 
 'x+1/2, -y+1/2, z' 
 '-x+1/2, y+1/2, z' 
 'x+1/2, y+1/2, z+1/2' 
 '-x+1/2, -y+1/2, z+1/2' 
 'x+1, -y+1, z+1/2' 
 '-x+1, y+1, z+1/2' 
  
_cell_length_a                    31.1008(7) 
_cell_length_b                    15.9050(6) 
_cell_length_c                    22.8099(7) 
_cell_angle_alpha                 90.00 
_cell_angle_beta                  90.00 
_cell_angle_gamma                 90.00 
_cell_volume                      11283.1(6) 
_cell_formula_units_Z             8 
_cell_measurement_temperature     150(2) 
_cell_measurement_reflns_used     8310 
_cell_measurement_theta_min       3.8500 
_cell_measurement_theta_max       77.2580 
  
_exptl_crystal_description        column 
_exptl_crystal_colour             ? 
_exptl_crystal_size_max           0.25 
_exptl_crystal_size_mid           0.20 
_exptl_crystal_size_min           0.15 
_exptl_crystal_density_meas       ? 
_exptl_crystal_density_diffrn     1.457 
_exptl_crystal_density_method     'not measured' 
_exptl_crystal_F_000              5120 
_exptl_absorpt_coefficient_mu     1.129 
_exptl_absorpt_correction_type    multi-scan 
_exptl_absorpt_correction_T_min   0.81565 
_exptl_absorpt_correction_T_max   1.00000 
_exptl_absorpt_process_details     
; 
CrysAlisPro 1.171.38.46 (Rigaku Oxford Diffraction, 2015) 
Empirical absorption correction using spherical harmonics, 
 implemented in SCALE3 ABSPACK scaling algorithm. 
; 
  
_exptl_special_details 
; 
 ? 
; 
  
_diffrn_ambient_temperature       150(2) 
_diffrn_radiation_wavelength      1.54178 
_diffrn_radiation_type            CuK\a 
_diffrn_radiation_source          'fine-focus sealed tube' 
_diffrn_radiation_monochromator   graphite 
_diffrn_measurement_device_type   'Xcalibur, Atlas, Gemini' 
_diffrn_measurement_method        ? 
_diffrn_detector_area_resol_mean  10.2496 
_diffrn_standards_number          ? 
_diffrn_standards_interval_count  ? 
_diffrn_standards_interval_time   ? 
_diffrn_standards_decay_%         ? 
_diffrn_reflns_number             16650 
_diffrn_reflns_av_R_equivalents   0.0284 
_diffrn_reflns_av_sigmaI/netI     0.0371 
_diffrn_reflns_limit_h_min        -37 
_diffrn_reflns_limit_h_max        32 
_diffrn_reflns_limit_k_min        -19 
_diffrn_reflns_limit_k_max        17 
_diffrn_reflns_limit_l_min        -27 
_diffrn_reflns_limit_l_max        27 
_diffrn_reflns_theta_min          2.84 
_diffrn_reflns_theta_max          67.99 
_reflns_number_total              8124 
_reflns_number_gt                 7472 
_reflns_threshold_expression      >2sigma(I) 
  
_computing_data_collection        'CrysAlisPro 1.171.38.41 (Rigaku OD, 2015)' 
_computing_cell_refinement        'CrysAlisPro 1.171.38.41 (Rigaku OD, 2015)' 
_computing_data_reduction         'CrysAlisPro 1.171.38.41 (Rigaku OD, 2015)' 
_computing_structure_solution     'SHELXS-97 (Sheldrick, 1990)' 
_computing_structure_refinement   'SHELXL-97 (Sheldrick, 1997)' 
_computing_molecular_graphics     SHELXTL 
_computing_publication_material   SHELXTL 
  
_refine_special_details 
; 
 Refinement of F^2^ against ALL reflections.  The weighted R-factor wR and 
 goodness of fit S are based on F^2^, conventional R-factors R are based 
 on F, with F set to zero for negative F^2^. The threshold expression of 
 F^2^ > 2sigma(F^2^) is used only for calculating R-factors(gt) etc. and is 
 not relevant to the choice of reflections for refinement.  R-factors based 
 on F^2^ are statistically about twice as large as those based on F, and R- 
 factors based on ALL data will be even larger. 
; 
  
_refine_ls_structure_factor_coef  Fsqd 
_refine_ls_matrix_type            full 
_refine_ls_weighting_scheme       calc 
_refine_ls_weighting_details 
 'calc w=1/[\s^2^(Fo^2^)+(0.0720P)^2^+3.5094P] where P=(Fo^2^+2Fc^2^)/3' 
_atom_sites_solution_primary      direct 
_atom_sites_solution_secondary    difmap 
_atom_sites_solution_hydrogens    geom 
_refine_ls_hydrogen_treatment     mixed 
_refine_ls_extinction_method      none 
_refine_ls_extinction_coef        ? 
_refine_ls_abs_structure_details 
 'Flack H D (1983), Acta Cryst. A39, 876-881' 
_refine_ls_abs_structure_Flack    0.42(9) 
_refine_ls_number_reflns          8124 
_refine_ls_number_parameters      775 
_refine_ls_number_restraints      2 
_refine_ls_R_factor_all           0.0472 
_refine_ls_R_factor_gt            0.0423 
_refine_ls_wR_factor_ref          0.1181 
_refine_ls_wR_factor_gt           0.1114 
_refine_ls_goodness_of_fit_ref    1.024 
_refine_ls_restrained_S_all       1.024 
_refine_ls_shift/su_max           0.017 
_refine_ls_shift/su_mean          0.003 
  
loop_ 
 _atom_site_label 
 _atom_site_type_symbol 
 _atom_site_fract_x 
 _atom_site_fract_y 
 _atom_site_fract_z 
 _atom_site_U_iso_or_equiv 
 _atom_site_adp_type 
 _atom_site_occupancy 
 _atom_site_symmetry_multiplicity 
 _atom_site_calc_flag 
 _atom_site_refinement_flags 
 _atom_site_disorder_assembly 
 _atom_site_disorder_group 
F1 F 0.75842(6) 0.60185(11) 0.97847(8) 0.0361(4) Uani 1 1 d . . . 
F2 F 0.75966(6) 0.52241(11) 1.08068(9) 0.0403(4) Uani 1 1 d . . . 
F3 F 0.80221(6) 0.77319(12) 1.17433(9) 0.0424(4) Uani 1 1 d . . . 
F4 F 0.79675(6) 0.85561(11) 1.07286(9) 0.0402(4) Uani 1 1 d . . . 
F5 F 0.50817(6) 0.87292(14) 1.16356(11) 0.0536(5) Uani 1 1 d . . . 
F6 F 0.51936(8) 0.80715(17) 1.27013(10) 0.0602(6) Uani 1 1 d . . . 
F7 F 0.54055(6) 0.53917(14) 1.18646(11) 0.0537(5) Uani 1 1 d . . . 
F8 F 0.52910(6) 0.60501(14) 1.08011(10) 0.0503(5) Uani 1 1 d . . . 
O1 O 0.75118(6) 0.64031(13) 1.22762(10) 0.0337(4) Uani 1 1 d . . . 
O2 O 0.67359(6) 0.64409(16) 1.29961(10) 0.0379(5) Uani 1 1 d . . . 
O3 O 0.58067(7) 0.61944(16) 1.30672(11) 0.0451(5) Uani 1 1 d . . . 
N1 N 0.73133(7) 0.81067(15) 0.94620(11) 0.0302(5) Uani 1 1 d . . . 
N2 N 0.54972(7) 0.79359(18) 1.02407(12) 0.0358(6) Uani 1 1 d . . . 
C1 C 0.62131(9) 0.76932(19) 0.94596(14) 0.0339(6) Uani 1 1 d . . . 
H1A H 0.6230 0.7493 0.9851 0.041 Uiso 1 1 calc R . . 
C2 C 0.58176(10) 0.7954(2) 0.92419(15) 0.0353(6) Uani 1 1 d . . . 
C3 C 0.57943(10) 0.8227(2) 0.86649(15) 0.0366(7) Uani 1 1 d . . . 
H3A H 0.5526 0.8404 0.8507 0.044 Uiso 1 1 calc R . . 
C4 C 0.61623(11) 0.8243(2) 0.83148(15) 0.0378(7) Uani 1 1 d . . . 
H4A H 0.6144 0.8424 0.7919 0.045 Uiso 1 1 calc R . . 
C5 C 0.65571(10) 0.79935(19) 0.85464(15) 0.0361(6) Uani 1 1 d . . . 
H5A H 0.6808 0.8013 0.8310 0.043 Uiso 1 1 calc R . . 
C6 C 0.65844(9) 0.77159(18) 0.91232(14) 0.0321(6) Uani 1 1 d . . . 
C7 C 0.70057(9) 0.74173(19) 0.93804(14) 0.0327(6) Uani 1 1 d . . . 
H7A H 0.6950 0.7146 0.9764 0.039 Uiso 1 1 calc R . . 
H7B H 0.7133 0.6990 0.9117 0.039 Uiso 1 1 calc R . . 
C8 C 0.71546(10) 0.8744(2) 0.98716(15) 0.0375(7) Uani 1 1 d . . . 
H8A H 0.7369 0.9193 0.9911 0.056 Uiso 1 1 calc R . . 
H8B H 0.7104 0.8485 1.0255 0.056 Uiso 1 1 calc R . . 
H8C H 0.6885 0.8981 0.9723 0.056 Uiso 1 1 calc R . . 
C9 C 0.77383(9) 0.77872(19) 0.96369(13) 0.0305(6) Uani 1 1 d . . . 
H9A H 0.7941 0.8267 0.9653 0.037 Uiso 1 1 calc R . . 
H9B H 0.7842 0.7400 0.9328 0.037 Uiso 1 1 calc R . . 
C10 C 0.77559(8) 0.73300(19) 1.02211(13) 0.0282(6) Uani 1 1 d . . . 
C11 C 0.76705(8) 0.64766(19) 1.02730(13) 0.0287(6) Uani 1 1 d . . . 
C12 C 0.76865(8) 0.60571(18) 1.08031(15) 0.0306(6) Uani 1 1 d . . . 
C13 C 0.77983(8) 0.64588(19) 1.13166(14) 0.0313(6) Uani 1 1 d . . . 
C14 C 0.78950(8) 0.7314(2) 1.12669(14) 0.0316(6) Uani 1 1 d . . . 
C15 C 0.78701(8) 0.77273(19) 1.07404(15) 0.0326(6) Uani 1 1 d . . . 
C16 C 0.78097(10) 0.6014(2) 1.18993(14) 0.0361(6) Uani 1 1 d . . . 
H16A H 0.7735 0.5414 1.1847 0.043 Uiso 1 1 calc R . . 
H16B H 0.8102 0.6047 1.2069 0.043 Uiso 1 1 calc R . . 
C17 C 0.74416(9) 0.5911(2) 1.27901(14) 0.0346(6) Uani 1 1 d . . . 
H17A H 0.7720 0.5779 1.2978 0.042 Uiso 1 1 calc R . . 
H17B H 0.7301 0.5374 1.2683 0.042 Uiso 1 1 calc R . . 
C18 C 0.71632(9) 0.6386(2) 1.32083(14) 0.0329(6) Uani 1 1 d . . . 
H18A H 0.7164 0.6100 1.3594 0.039 Uiso 1 1 calc R . . 
H18B H 0.7281 0.6959 1.3263 0.039 Uiso 1 1 calc R . . 
C19 C 0.64585(9) 0.6785(2) 1.34268(14) 0.0354(6) Uani 1 1 d . . . 
H19A H 0.6583 0.7315 1.3578 0.042 Uiso 1 1 calc R . . 
H19B H 0.6433 0.6387 1.3759 0.042 Uiso 1 1 calc R . . 
C20 C 0.60209(10) 0.6955(2) 1.31785(16) 0.0418(7) Uani 1 1 d . . . 
H20A H 0.5852 0.7296 1.3460 0.050 Uiso 1 1 calc R . . 
H20B H 0.6049 0.7279 1.2810 0.050 Uiso 1 1 calc R . . 
C21 C 0.53649(11) 0.6316(3) 1.29157(17) 0.0502(9) Uani 1 1 d . . . 
H21A H 0.5229 0.6685 1.3212 0.060 Uiso 1 1 calc R . . 
H21B H 0.5216 0.5767 1.2928 0.060 Uiso 1 1 calc R . . 
C22 C 0.53043(9) 0.6704(3) 1.23122(17) 0.0446(8) Uani 1 1 d U . . 
C23 C 0.52247(10) 0.7554(3) 1.22332(16) 0.0475(8) Uani 1 1 d U . . 
C24 C 0.51676(10) 0.7902(2) 1.16815(17) 0.0429(8) Uani 1 1 d . . . 
C25 C 0.51899(9) 0.7421(2) 1.11798(14) 0.0385(7) Uani 1 1 d . . . 
C26 C 0.52731(9) 0.6561(2) 1.12669(16) 0.0401(7) Uani 1 1 d . . . 
C27 C 0.53321(9) 0.6228(2) 1.18178(17) 0.0426(8) Uani 1 1 d . . . 
C28 C 0.51020(9) 0.7746(2) 1.05691(16) 0.0419(8) Uani 1 1 d . . . 
H28A H 0.4934 0.7321 1.0351 0.050 Uiso 1 1 calc R . . 
H28B H 0.4925 0.8263 1.0597 0.050 Uiso 1 1 calc R . . 
C29 C 0.56699(11) 0.8749(2) 1.04256(18) 0.0447(8) Uani 1 1 d . . . 
H29A H 0.5933 0.8870 1.0206 0.067 Uiso 1 1 calc R . . 
H29B H 0.5735 0.8731 1.0846 0.067 Uiso 1 1 calc R . . 
H29C H 0.5457 0.9190 1.0349 0.067 Uiso 1 1 calc R . . 
C30 C 0.54141(10) 0.7918(2) 0.96128(15) 0.0408(7) Uani 1 1 d . . . 
H30A H 0.5228 0.8401 0.9510 0.049 Uiso 1 1 calc R . . 
H30B H 0.5255 0.7397 0.9517 0.049 Uiso 1 1 calc R . . 
F9 F 0.54120(6) 0.42674(14) 1.39997(10) 0.0467(5) Uani 1 1 d . . . 
F10 F 0.56990(6) 0.37461(13) 1.29647(9) 0.0467(5) Uani 1 1 d . . . 
F11 F 0.71157(5) 0.44121(12) 1.35327(9) 0.0408(4) Uani 1 1 d . . . 
F12 F 0.68252(5) 0.49909(12) 1.45574(9) 0.0419(4) Uani 1 1 d . . . 
F13 F 0.72856(6) 0.83476(15) 1.24402(11) 0.0536(5) Uani 1 1 d . . . 
F14 F 0.70856(6) 0.87168(13) 1.35452(10) 0.0462(5) Uani 1 1 d . . . 
F15 F 0.57831(6) 0.99424(13) 1.29176(10) 0.0466(5) Uani 1 1 d . . . 
F16 F 0.59823(7) 0.95651(14) 1.18142(10) 0.0497(5) Uani 1 1 d . . . 
O4 O 0.67428(7) 0.43783(14) 1.22620(10) 0.0358(5) Uani 1 1 d . . . 
O5 O 0.62583(6) 0.59416(14) 1.13473(11) 0.0373(5) Uani 1 1 d . . . 
O6 O 0.65171(8) 0.81259(14) 1.11944(11) 0.0411(5) Uani 1 1 d . . . 
N3 N 0.59403(8) 0.58734(16) 1.49297(11) 0.0300(5) Uani 1 1 d . . . 
N4 N 0.61784(8) 0.89367(17) 1.42700(12) 0.0340(5) Uani 1 1 d . . . 
C31 C 0.61166(8) 0.7637(2) 1.52128(14) 0.0315(6) Uani 1 1 d . . . 
H31A H 0.6196 0.7433 1.4836 0.038 Uiso 1 1 calc R . . 
C32 C 0.61353(9) 0.8509(2) 1.53323(14) 0.0333(6) Uani 1 1 d . . . 
C33 C 0.60327(9) 0.8796(2) 1.58922(15) 0.0376(7) Uani 1 1 d . . . 
H33A H 0.6039 0.9382 1.5974 0.045 Uiso 1 1 calc R . . 
C34 C 0.59224(10) 0.8239(2) 1.63255(15) 0.0403(7) Uani 1 1 d . . . 
H34A H 0.5866 0.8440 1.6710 0.048 Uiso 1 1 calc R . . 
C35 C 0.58928(9) 0.7383(2) 1.62065(14) 0.0360(6) Uani 1 1 d . . . 
H35A H 0.5811 0.7003 1.6508 0.043 Uiso 1 1 calc R . . 
C36 C 0.59832(8) 0.7079(2) 1.56433(13) 0.0299(6) Uani 1 1 d . . . 
C37 C 0.59451(10) 0.6132(2) 1.55470(14) 0.0348(6) Uani 1 1 d . . . 
H37A H 0.6189 0.5852 1.5745 0.042 Uiso 1 1 calc R . . 
H37B H 0.5677 0.5933 1.5736 0.042 Uiso 1 1 calc R . . 
C38 C 0.55495(10) 0.6151(2) 1.46257(15) 0.0366(7) Uani 1 1 d . . . 
H38A H 0.5560 0.5965 1.4216 0.055 Uiso 1 1 calc R . . 
H38B H 0.5531 0.6765 1.4640 0.055 Uiso 1 1 calc R . . 
H38C H 0.5297 0.5906 1.4818 0.055 Uiso 1 1 calc R . . 
C39 C 0.59663(10) 0.4953(2) 1.49129(14) 0.0359(6) Uani 1 1 d . . . 
H39A H 0.5681 0.4711 1.5007 0.043 Uiso 1 1 calc R . . 
H39B H 0.6173 0.4756 1.5213 0.043 Uiso 1 1 calc R . . 
C40 C 0.61087(9) 0.46485(18) 1.43137(13) 0.0319(6) Uani 1 1 d . . . 
C41 C 0.58379(9) 0.43210(19) 1.38948(15) 0.0343(6) Uani 1 1 d . . . 
C42 C 0.59850(10) 0.40451(19) 1.33556(15) 0.0346(6) Uani 1 1 d . . . 
C43 C 0.64191(10) 0.40661(18) 1.32171(14) 0.0326(6) Uani 1 1 d . . . 
C44 C 0.66900(9) 0.43964(18) 1.36428(14) 0.0314(6) Uani 1 1 d . . . 
C45 C 0.65437(9) 0.46816(18) 1.41680(14) 0.0320(6) Uani 1 1 d . . . 
C46 C 0.65996(10) 0.37348(19) 1.26441(14) 0.0355(6) Uani 1 1 d . . . 
H46A H 0.6843 0.3354 1.2731 0.043 Uiso 1 1 calc R . . 
H46B H 0.6375 0.3401 1.2443 0.043 Uiso 1 1 calc R . . 
C47 C 0.63999(10) 0.4855(2) 1.20223(14) 0.0350(6) Uani 1 1 d . . . 
H47A H 0.6244 0.5158 1.2337 0.042 Uiso 1 1 calc R . . 
H47B H 0.6194 0.4482 1.1816 0.042 Uiso 1 1 calc R . . 
C48 C 0.65975(9) 0.54675(19) 1.16005(14) 0.0346(6) Uani 1 1 d . . . 
H48A H 0.6800 0.5844 1.1809 0.042 Uiso 1 1 calc R . . 
H48B H 0.6758 0.5163 1.1292 0.042 Uiso 1 1 calc R . . 
C49 C 0.63992(10) 0.6671(2) 1.10515(14) 0.0346(6) Uani 1 1 d . . . 
H49A H 0.6158 0.6908 1.0822 0.042 Uiso 1 1 calc R . . 
H49B H 0.6631 0.6518 1.0773 0.042 Uiso 1 1 calc R . . 
C50 C 0.65657(12) 0.7335(2) 1.14737(17) 0.0474(8) Uani 1 1 d . . . 
H50A H 0.6399 0.7322 1.1844 0.057 Uiso 1 1 calc R . . 
H50B H 0.6872 0.7231 1.1566 0.057 Uiso 1 1 calc R . . 
C51 C 0.67618(13) 0.8776(2) 1.14562(16) 0.0462(8) Uani 1 1 d . . . 
H51A H 0.6722 0.9299 1.1227 0.055 Uiso 1 1 calc R . . 
H51B H 0.7070 0.8624 1.1437 0.055 Uiso 1 1 calc R . . 
C52 C 0.66411(10) 0.8945(2) 1.20925(15) 0.0387(7) Uani 1 1 d . . . 
C53 C 0.69086(10) 0.8736(2) 1.25509(17) 0.0384(7) Uani 1 1 d . . . 
C54 C 0.68084(9) 0.89237(19) 1.31255(15) 0.0351(6) Uani 1 1 d . . . 
C55 C 0.64310(10) 0.93435(19) 1.32728(14) 0.0347(6) Uani 1 1 d . . . 
C56 C 0.61563(10) 0.95380(19) 1.28094(16) 0.0361(6) Uani 1 1 d . . . 
C57 C 0.62586(10) 0.9342(2) 1.22361(15) 0.0369(6) Uani 1 1 d . . . 
C58 C 0.63568(11) 0.9611(2) 1.39033(15) 0.0389(7) Uani 1 1 d . . . 
H58A H 0.6633 0.9799 1.4074 0.047 Uiso 1 1 calc R . . 
H58B H 0.6157 1.0096 1.3908 0.047 Uiso 1 1 calc R . . 
C59 C 0.57115(10) 0.8879(2) 1.41723(17) 0.0428(8) Uani 1 1 d . . . 
H59A H 0.5593 0.8426 1.4414 0.064 Uiso 1 1 calc R . . 
H59B H 0.5656 0.8758 1.3758 0.064 Uiso 1 1 calc R . . 
H59C H 0.5576 0.9413 1.4280 0.064 Uiso 1 1 calc R . . 
C60 C 0.62693(10) 0.9151(2) 1.48776(15) 0.0349(6) Uani 1 1 d . . . 
H60A H 0.6123 0.9688 1.4969 0.042 Uiso 1 1 calc R . . 
H60B H 0.6582 0.9247 1.4917 0.042 Uiso 1 1 calc R . . 
  
loop_ 
 _atom_site_aniso_label 
 _atom_site_aniso_U_11 
 _atom_site_aniso_U_22 
 _atom_site_aniso_U_33 
 _atom_site_aniso_U_23 
 _atom_site_aniso_U_13 
 _atom_site_aniso_U_12 
F1 0.0420(9) 0.0338(9) 0.0324(9) -0.0117(8) -0.0050(7) 0.0008(7) 
F2 0.0511(10) 0.0271(8) 0.0427(10) -0.0037(8) -0.0012(8) 0.0004(7) 
F3 0.0466(9) 0.0466(11) 0.0342(10) -0.0127(9) -0.0053(8) -0.0068(8) 
F4 0.0471(9) 0.0314(9) 0.0423(10) -0.0060(8) -0.0016(8) -0.0133(8) 
F5 0.0482(11) 0.0552(12) 0.0573(14) -0.0089(11) -0.0032(10) 0.0026(9) 
F6 0.0590(12) 0.0796(16) 0.0421(12) -0.0170(12) 0.0000(10) 0.0041(11) 
F7 0.0403(9) 0.0496(11) 0.0711(15) 0.0092(11) -0.0026(9) -0.0083(9) 
F8 0.0410(9) 0.0580(12) 0.0518(12) -0.0143(11) -0.0025(9) -0.0017(9) 
O1 0.0338(9) 0.0342(10) 0.0330(11) 0.0013(9) 0.0039(8) 0.0026(8) 
O2 0.0311(9) 0.0558(14) 0.0269(10) -0.0039(10) -0.0004(8) -0.0002(9) 
O3 0.0398(11) 0.0519(14) 0.0437(14) 0.0028(11) -0.0001(10) -0.0017(10) 
N1 0.0293(11) 0.0330(12) 0.0284(12) -0.0008(10) 0.0006(9) -0.0039(9) 
N2 0.0246(10) 0.0459(15) 0.0369(14) -0.0019(12) -0.0037(10) -0.0047(10) 
C1 0.0336(13) 0.0328(15) 0.0353(16) 0.0013(13) -0.0038(12) -0.0047(12) 
C2 0.0328(13) 0.0348(15) 0.0385(17) 0.0004(13) -0.0052(12) -0.0055(12) 
C3 0.0373(14) 0.0356(15) 0.0368(17) -0.0003(13) -0.0113(12) -0.0001(12) 
C4 0.0486(16) 0.0318(15) 0.0329(16) 0.0029(13) -0.0068(13) -0.0007(13) 
C5 0.0393(14) 0.0312(14) 0.0380(17) -0.0045(13) 0.0041(12) -0.0062(12) 
C6 0.0360(14) 0.0234(12) 0.0368(16) -0.0005(12) -0.0030(12) -0.0051(11) 
C7 0.0323(13) 0.0296(14) 0.0362(15) -0.0005(12) 0.0009(12) -0.0025(11) 
C8 0.0404(15) 0.0328(15) 0.0394(17) -0.0064(14) 0.0005(13) 0.0033(12) 
C9 0.0283(13) 0.0354(14) 0.0278(14) -0.0036(12) 0.0043(10) -0.0040(11) 
C10 0.0205(11) 0.0354(15) 0.0286(14) -0.0029(12) 0.0033(10) -0.0017(10) 
C11 0.0222(11) 0.0363(15) 0.0276(14) -0.0082(12) -0.0005(10) 0.0025(10) 
C12 0.0263(12) 0.0281(13) 0.0373(15) -0.0029(12) 0.0028(11) 0.0028(10) 
C13 0.0244(11) 0.0382(15) 0.0314(14) -0.0040(13) 0.0022(11) 0.0071(11) 
C14 0.0256(12) 0.0407(16) 0.0286(14) -0.0070(13) -0.0016(10) -0.0017(11) 
C15 0.0265(12) 0.0315(14) 0.0398(17) -0.0047(13) 0.0033(11) -0.0040(10) 
C16 0.0371(14) 0.0407(16) 0.0306(15) -0.0018(13) 0.0001(12) 0.0110(12) 
C17 0.0332(13) 0.0362(15) 0.0344(15) 0.0029(13) -0.0040(12) -0.0024(12) 
C18 0.0344(13) 0.0386(15) 0.0257(14) 0.0007(12) -0.0038(11) -0.0027(12) 
C19 0.0387(14) 0.0348(15) 0.0326(15) 0.0029(13) 0.0013(12) -0.0021(12) 
C20 0.0384(15) 0.0482(19) 0.0390(17) 0.0011(15) 0.0028(13) 0.0018(13) 
C21 0.0379(15) 0.070(2) 0.043(2) 0.0093(18) 0.0017(15) -0.0099(15) 
C22 0.0263(13) 0.061(2) 0.047(2) 0.0042(17) 0.0013(13) -0.0054(13) 
C23 0.0310(13) 0.072(2) 0.0397(18) -0.0143(18) -0.0004(13) -0.0033(15) 
C24 0.0293(13) 0.0515(19) 0.048(2) -0.0037(16) -0.0005(13) -0.0007(13) 
C25 0.0232(12) 0.058(2) 0.0337(16) -0.0007(15) -0.0018(11) -0.0051(12) 
C26 0.0230(12) 0.0544(19) 0.0428(18) -0.0018(16) 0.0017(12) -0.0077(12) 
C27 0.0263(13) 0.0526(19) 0.049(2) 0.0025(16) 0.0006(13) -0.0080(13) 
C28 0.0253(13) 0.059(2) 0.0417(18) 0.0029(16) -0.0037(12) -0.0033(13) 
C29 0.0385(15) 0.0442(18) 0.051(2) -0.0027(16) 0.0003(14) -0.0033(14) 
C30 0.0307(14) 0.0559(19) 0.0358(17) 0.0057(15) -0.0073(12) -0.0030(14) 
F9 0.0314(8) 0.0569(12) 0.0518(12) -0.0064(10) 0.0096(8) -0.0028(8) 
F10 0.0419(9) 0.0521(11) 0.0462(12) -0.0111(10) -0.0042(8) -0.0047(8) 
F11 0.0286(8) 0.0432(10) 0.0505(11) 0.0052(9) 0.0080(8) 0.0066(7) 
F12 0.0395(8) 0.0425(10) 0.0436(10) -0.0031(9) -0.0078(8) 0.0023(8) 
F13 0.0367(9) 0.0601(13) 0.0641(15) 0.0047(11) 0.0098(9) 0.0054(9) 
F14 0.0362(9) 0.0539(12) 0.0485(12) 0.0106(10) -0.0111(8) -0.0056(8) 
F15 0.0453(9) 0.0437(10) 0.0509(12) -0.0030(9) -0.0034(8) 0.0133(8) 
F16 0.0601(11) 0.0513(12) 0.0378(11) 0.0058(9) -0.0143(9) 0.0036(9) 
O4 0.0395(10) 0.0321(11) 0.0358(11) 0.0024(9) 0.0061(9) 0.0055(9) 
O5 0.0327(10) 0.0376(11) 0.0416(12) 0.0054(10) -0.0041(9) -0.0063(8) 
O6 0.0517(12) 0.0348(11) 0.0368(12) 0.0056(10) 0.0006(10) -0.0036(10) 
N3 0.0345(12) 0.0290(12) 0.0265(12) 0.0009(10) 0.0030(9) 0.0081(10) 
N4 0.0336(12) 0.0355(13) 0.0330(13) 0.0007(11) -0.0021(10) -0.0033(10) 
C31 0.0253(12) 0.0388(16) 0.0305(14) -0.0014(13) 0.0001(11) 0.0028(11) 
C32 0.0250(12) 0.0370(16) 0.0379(16) 0.0002(13) -0.0054(11) 0.0041(11) 
C33 0.0333(14) 0.0450(17) 0.0344(16) -0.0095(14) -0.0041(12) 0.0024(12) 
C34 0.0367(15) 0.0525(19) 0.0318(16) -0.0129(15) -0.0030(12) 0.0027(13) 
C35 0.0291(13) 0.0490(18) 0.0301(15) -0.0008(14) -0.0006(11) 0.0038(12) 
C36 0.0222(11) 0.0383(15) 0.0293(14) 0.0007(12) -0.0015(10) 0.0045(10) 
C37 0.0354(14) 0.0421(17) 0.0268(15) 0.0016(13) 0.0030(11) 0.0033(12) 
C38 0.0333(14) 0.0399(16) 0.0365(16) -0.0044(14) -0.0005(12) 0.0066(13) 
C39 0.0438(15) 0.0340(15) 0.0299(15) 0.0033(13) 0.0052(12) 0.0026(12) 
C40 0.0396(14) 0.0252(13) 0.0308(15) 0.0039(12) 0.0077(12) 0.0044(11) 
C41 0.0304(13) 0.0308(14) 0.0417(18) 0.0018(13) 0.0051(12) 0.0005(11) 
C42 0.0369(14) 0.0290(14) 0.0379(16) 0.0028(13) 0.0003(12) 0.0006(11) 
C43 0.0397(14) 0.0240(12) 0.0341(15) 0.0020(12) 0.0054(12) 0.0052(11) 
C44 0.0281(12) 0.0235(13) 0.0427(17) 0.0055(12) 0.0041(11) 0.0062(10) 
C45 0.0336(13) 0.0251(13) 0.0374(16) 0.0038(12) -0.0046(12) 0.0029(11) 
C46 0.0444(15) 0.0271(14) 0.0351(17) -0.0014(12) 0.0092(13) 0.0069(12) 
C47 0.0367(13) 0.0333(15) 0.0351(16) -0.0004(13) -0.0008(12) -0.0022(12) 
C48 0.0337(13) 0.0348(15) 0.0353(16) 0.0002(13) -0.0001(12) -0.0038(12) 
C49 0.0332(13) 0.0398(17) 0.0308(14) 0.0043(13) -0.0021(12) -0.0037(12) 
C50 0.061(2) 0.0347(16) 0.047(2) 0.0040(15) -0.0147(16) -0.0003(15) 
C51 0.060(2) 0.0424(18) 0.0357(18) -0.0014(15) 0.0083(15) -0.0143(15) 
C52 0.0435(15) 0.0302(14) 0.0424(18) 0.0002(13) 0.0046(14) -0.0142(13) 
C53 0.0327(14) 0.0325(15) 0.0500(19) 0.0024(14) 0.0063(13) -0.0046(12) 
C54 0.0328(13) 0.0305(15) 0.0419(17) 0.0065(13) -0.0027(13) -0.0088(11) 
C55 0.0382(14) 0.0307(14) 0.0350(16) 0.0007(13) 0.0001(12) -0.0106(12) 
C56 0.0363(14) 0.0266(13) 0.0452(17) 0.0020(13) 0.0010(13) -0.0023(11) 
C57 0.0469(16) 0.0303(14) 0.0334(16) 0.0059(13) -0.0076(13) -0.0046(13) 
C58 0.0462(16) 0.0319(15) 0.0385(17) 0.0010(13) -0.0018(13) -0.0058(13) 
C59 0.0339(15) 0.0464(18) 0.048(2) 0.0026(16) -0.0072(14) -0.0030(13) 
C60 0.0348(14) 0.0336(15) 0.0362(16) -0.0049(13) 0.0003(12) 0.0033(12) 
  
_geom_special_details 
; 
 All esds (except the esd in the dihedral angle between two l.s. planes) 
 are estimated using the full covariance matrix.  The cell esds are taken 
 into account individually in the estimation of esds in distances, angles 
 and torsion angles; correlations between esds in cell parameters are only 
 used when they are defined by crystal symmetry.  An approximate (isotropic) 
 treatment of cell esds is used for estimating esds involving l.s. planes. 
; 
  
loop_ 
 _geom_bond_atom_site_label_1 
 _geom_bond_atom_site_label_2 
 _geom_bond_distance 
 _geom_bond_site_symmetry_2 
 _geom_bond_publ_flag 
F1 C11 1.358(3) . ? 
F2 C12 1.354(3) . ? 
F3 C14 1.334(4) . ? 
F4 C15 1.353(4) . ? 
F5 C24 1.347(4) . ? 
F6 C23 1.352(4) . ? 
F7 C27 1.354(4) . ? 
F8 C26 1.338(4) . ? 
O1 C16 1.407(4) . ? 
O1 C17 1.426(4) . ? 
O2 C18 1.417(3) . ? 
O2 C19 1.417(4) . ? 
O3 C20 1.404(4) . ? 
O3 C21 1.430(4) . ? 
N1 C8 1.464(4) . ? 
N1 C7 1.467(4) . ? 
N1 C9 1.471(4) . ? 
N2 C30 1.456(4) . ? 
N2 C29 1.462(5) . ? 
N2 C28 1.470(4) . ? 
C1 C6 1.387(4) . ? 
C1 C2 1.389(4) . ? 
C2 C3 1.388(5) . ? 
C2 C30 1.515(5) . ? 
C3 C4 1.396(5) . ? 
C4 C5 1.394(5) . ? 
C5 C6 1.390(5) . ? 
C6 C7 1.512(4) . ? 
C9 C10 1.519(4) . ? 
C10 C15 1.389(4) . ? 
C10 C11 1.388(4) . ? 
C11 C12 1.382(4) . ? 
C12 C13 1.379(4) . ? 
C13 C14 1.397(4) . ? 
C13 C16 1.506(4) . ? 
C14 C15 1.371(5) . ? 
C17 C18 1.494(4) . ? 
C19 C20 1.499(4) . ? 
C21 C22 1.520(5) . ? 
C22 C27 1.361(5) . ? 
C22 C23 1.386(6) . ? 
C23 C24 1.386(6) . ? 
C24 C25 1.378(5) . ? 
C25 C26 1.406(5) . ? 
C25 C28 1.511(5) . ? 
C26 C27 1.376(5) . ? 
F9 C41 1.349(4) . ? 
F10 C42 1.346(4) . ? 
F11 C44 1.348(3) . ? 
F12 C45 1.341(4) . ? 
F13 C53 1.349(4) . ? 
F14 C54 1.330(4) . ? 
F15 C56 1.350(4) . ? 
F16 C57 1.338(4) . ? 
O4 C46 1.416(4) . ? 
O4 C47 1.418(4) . ? 
O5 C49 1.412(4) . ? 
O5 C48 1.419(4) . ? 
O6 C51 1.416(4) . ? 
O6 C50 1.418(4) . ? 
N3 C39 1.467(4) . ? 
N3 C37 1.467(4) . ? 
N3 C38 1.467(4) . ? 
N4 C60 1.455(4) . ? 
N4 C58 1.469(4) . ? 
N4 C59 1.472(4) . ? 
C31 C36 1.387(4) . ? 
C31 C32 1.414(4) . ? 
C32 C33 1.394(5) . ? 
C32 C60 1.514(5) . ? 
C33 C34 1.371(5) . ? 
C34 C35 1.392(5) . ? 
C35 C36 1.401(4) . ? 
C36 C37 1.526(4) . ? 
C39 C40 1.516(4) . ? 
C40 C41 1.376(5) . ? 
C40 C45 1.394(4) . ? 
C41 C42 1.384(5) . ? 
C42 C43 1.387(4) . ? 
C43 C44 1.389(5) . ? 
C43 C46 1.517(4) . ? 
C44 C45 1.359(5) . ? 
C47 C48 1.501(4) . ? 
C49 C50 1.521(5) . ? 
C51 C52 1.523(5) . ? 
C52 C53 1.377(5) . ? 
C52 C57 1.386(5) . ? 
C53 C54 1.380(5) . ? 
C54 C55 1.391(5) . ? 
C55 C56 1.394(5) . ? 
C55 C58 1.518(5) . ? 
C56 C57 1.382(5) . ? 
  
loop_ 
 _geom_angle_atom_site_label_1 
 _geom_angle_atom_site_label_2 
 _geom_angle_atom_site_label_3 
 _geom_angle 
 _geom_angle_site_symmetry_1 
 _geom_angle_site_symmetry_3 
 _geom_angle_publ_flag 
C16 O1 C17 111.2(2) . . ? 
C18 O2 C19 111.0(2) . . ? 
C20 O3 C21 112.5(3) . . ? 
C8 N1 C7 112.2(2) . . ? 
C8 N1 C9 111.7(2) . . ? 
C7 N1 C9 111.2(2) . . ? 
C30 N2 C29 111.5(3) . . ? 
C30 N2 C28 110.4(2) . . ? 
C29 N2 C28 110.0(3) . . ? 
C6 C1 C2 122.1(3) . . ? 
C3 C2 C1 118.6(3) . . ? 
C3 C2 C30 119.9(3) . . ? 
C1 C2 C30 121.5(3) . . ? 
C2 C3 C4 120.3(3) . . ? 
C5 C4 C3 120.0(3) . . ? 
C6 C5 C4 120.2(3) . . ? 
C1 C6 C5 118.7(3) . . ? 
C1 C6 C7 119.9(3) . . ? 
C5 C6 C7 121.3(3) . . ? 
N1 C7 C6 112.3(2) . . ? 
N1 C9 C10 115.8(2) . . ? 
C15 C10 C11 114.9(3) . . ? 
C15 C10 C9 122.7(3) . . ? 
C11 C10 C9 122.4(3) . . ? 
F1 C11 C12 117.8(3) . . ? 
F1 C11 C10 119.5(3) . . ? 
C12 C11 C10 122.7(3) . . ? 
F2 C12 C13 120.0(3) . . ? 
F2 C12 C11 118.1(3) . . ? 
C13 C12 C11 121.9(3) . . ? 
C12 C13 C14 115.9(3) . . ? 
C12 C13 C16 122.6(3) . . ? 
C14 C13 C16 121.6(3) . . ? 
F3 C14 C15 119.4(3) . . ? 
F3 C14 C13 118.9(3) . . ? 
C15 C14 C13 121.7(3) . . ? 
F4 C15 C14 118.2(3) . . ? 
F4 C15 C10 118.9(3) . . ? 
C14 C15 C10 122.9(3) . . ? 
O1 C16 C13 108.5(2) . . ? 
O1 C17 C18 109.6(2) . . ? 
O2 C18 C17 110.9(2) . . ? 
O2 C19 C20 111.1(3) . . ? 
O3 C20 C19 110.1(3) . . ? 
O3 C21 C22 113.1(3) . . ? 
C27 C22 C23 116.5(4) . . ? 
C27 C22 C21 121.1(4) . . ? 
C23 C22 C21 122.4(4) . . ? 
F6 C23 C22 120.3(4) . . ? 
F6 C23 C24 117.7(4) . . ? 
C22 C23 C24 122.0(4) . . ? 
F5 C24 C25 119.2(3) . . ? 
F5 C24 C23 119.1(3) . . ? 
C25 C24 C23 121.7(3) . . ? 
C24 C25 C26 115.6(3) . . ? 
C24 C25 C28 124.5(3) . . ? 
C26 C25 C28 119.8(3) . . ? 
F8 C26 C27 119.1(3) . . ? 
F8 C26 C25 119.1(3) . . ? 
C27 C26 C25 121.8(3) . . ? 
F7 C27 C22 119.5(3) . . ? 
F7 C27 C26 118.2(3) . . ? 
C22 C27 C26 122.3(3) . . ? 
N2 C28 C25 112.9(2) . . ? 
N2 C30 C2 113.7(3) . . ? 
C46 O4 C47 112.8(2) . . ? 
C49 O5 C48 113.6(2) . . ? 
C51 O6 C50 113.6(3) . . ? 
C39 N3 C37 107.7(2) . . ? 
C39 N3 C38 109.5(2) . . ? 
C37 N3 C38 112.2(2) . . ? 
C60 N4 C58 107.3(2) . . ? 
C60 N4 C59 110.5(3) . . ? 
C58 N4 C59 109.4(3) . . ? 
C36 C31 C32 120.2(3) . . ? 
C33 C32 C31 119.3(3) . . ? 
C33 C32 C60 118.0(3) . . ? 
C31 C32 C60 122.7(3) . . ? 
C34 C33 C32 120.4(3) . . ? 
C33 C34 C35 120.6(3) . . ? 
C34 C35 C36 120.2(3) . . ? 
C31 C36 C35 119.2(3) . . ? 
C31 C36 C37 123.6(3) . . ? 
C35 C36 C37 117.2(3) . . ? 
N3 C37 C36 114.6(3) . . ? 
N3 C39 C40 111.0(3) . . ? 
C41 C40 C45 116.3(3) . . ? 
C41 C40 C39 124.6(3) . . ? 
C45 C40 C39 119.1(3) . . ? 
F9 C41 C40 120.1(3) . . ? 
F9 C41 C42 117.5(3) . . ? 
C40 C41 C42 122.3(3) . . ? 
F10 C42 C41 118.8(3) . . ? 
F10 C42 C43 120.1(3) . . ? 
C41 C42 C43 121.1(3) . . ? 
C44 C43 C42 116.1(3) . . ? 
C44 C43 C46 120.6(3) . . ? 
C42 C43 C46 123.2(3) . . ? 
F11 C44 C45 119.1(3) . . ? 
F11 C44 C43 118.2(3) . . ? 
C45 C44 C43 122.6(3) . . ? 
F12 C45 C44 119.2(3) . . ? 
F12 C45 C40 119.3(3) . . ? 
C44 C45 C40 121.5(3) . . ? 
O4 C46 C43 113.3(2) . . ? 
O4 C47 C48 106.6(2) . . ? 
O5 C48 C47 107.5(2) . . ? 
O5 C49 C50 112.0(3) . . ? 
O6 C50 C49 107.2(3) . . ? 
O6 C51 C52 113.4(3) . . ? 
C53 C52 C57 116.7(3) . . ? 
C53 C52 C51 122.2(3) . . ? 
C57 C52 C51 121.1(3) . . ? 
F13 C53 C52 119.6(3) . . ? 
F13 C53 C54 118.2(3) . . ? 
C52 C53 C54 122.2(3) . . ? 
F14 C54 C53 118.9(3) . . ? 
F14 C54 C55 119.5(3) . . ? 
C53 C54 C55 121.6(3) . . ? 
C54 C55 C56 116.1(3) . . ? 
C54 C55 C58 119.5(3) . . ? 
C56 C55 C58 124.3(3) . . ? 
F15 C56 C57 118.6(3) . . ? 
F15 C56 C55 119.6(3) . . ? 
C57 C56 C55 121.8(3) . . ? 
F16 C57 C56 118.2(3) . . ? 
F16 C57 C52 120.1(3) . . ? 
C56 C57 C52 121.6(3) . . ? 
N4 C58 C55 113.1(3) . . ? 
N4 C60 C32 116.2(3) . . ? 
  
_diffrn_measured_fraction_theta_max    0.999 
_diffrn_reflns_theta_full              67.99 
_diffrn_measured_fraction_theta_full   0.999 
_refine_diff_density_max    0.364 
_refine_diff_density_min   -0.194 
_refine_diff_density_rms    0.045 
